# Supplementary material for: Proof-of-Concept for the Analgesic Effect and Thermoregulatory Safety of Orally Administered Multi-Target Compound SZV 1287 in Mice: A Novel Drug Candidate for Neuropathic Pain
Source: Biomedicines. 2021 Jun 29;9(7):749. doi: 10.3390/biomedicines9070749 (PMC8301340; doi:10.3390/biomedicines9070749)
Supplement: Supplementary file 1 [file biomedicines-09-00749-s001.zip › biomedicines-1217914-SI.pdf]

## Supplementary Materials

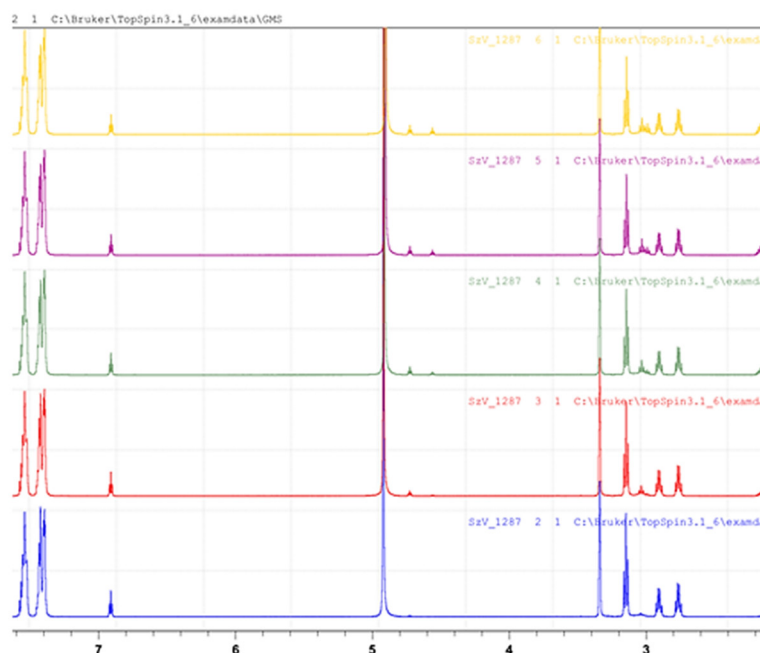

**Figure S1.** Series of  $^1\text{H}$  NMR spectra of SZV 1287 in methanol- $\text{d}_4$  ( $\text{CD}_3\text{OD}$ ) and deuterium oxide ( $\text{D}_2\text{O}$ ) + trifluoroacetic acid (TFA) taken between 5–120 min after treatment with trifluoroacetic acid (TFA).

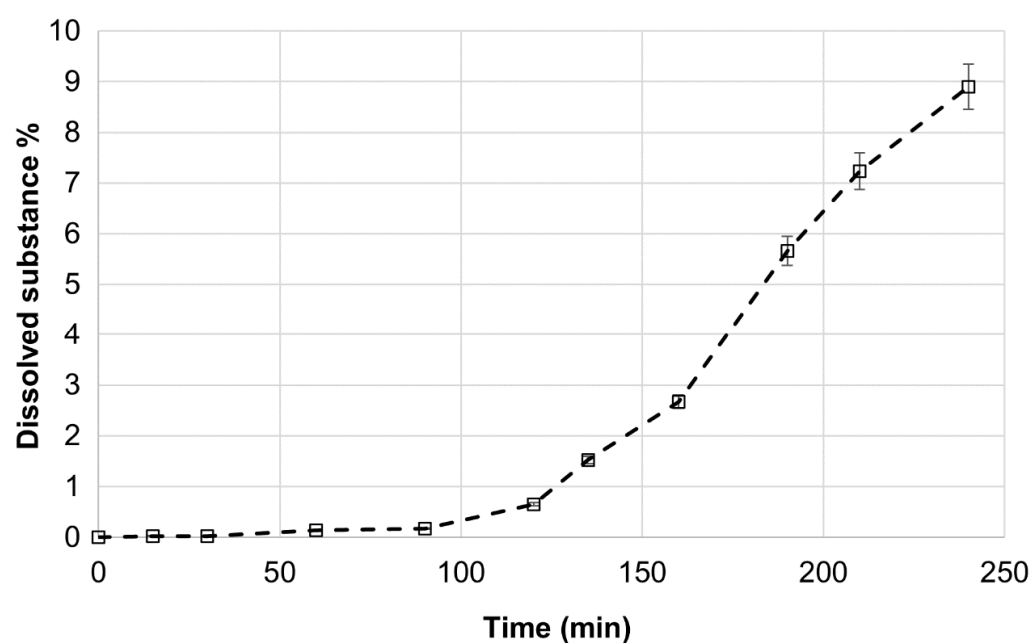

**Figure S2.** In vitro dissolution graph for SZV 1287 in pH 1.2 hydrochloric acid (0–120 min) and pH 6.8 phosphate buffer (120–240 min).

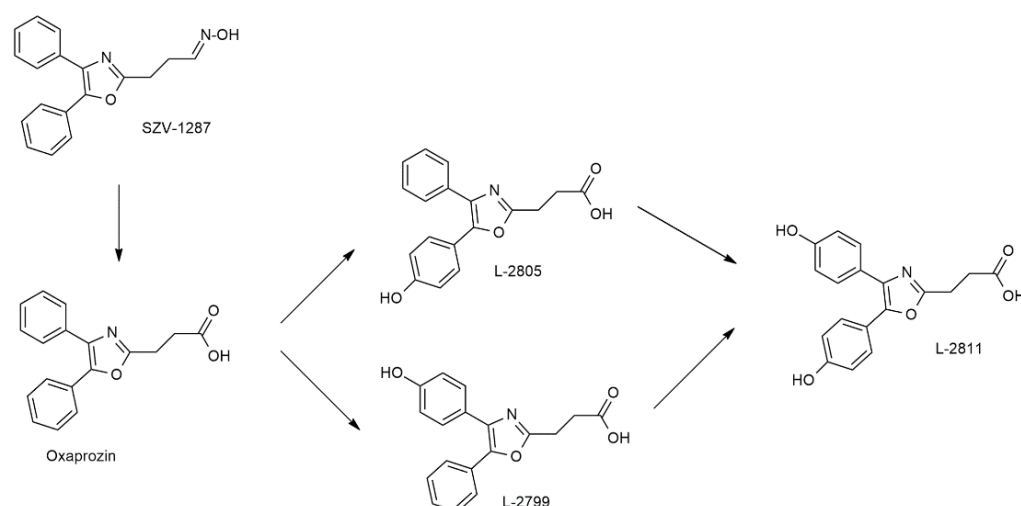

**Figure S3.** A potential route of formation of SZV 1287 metabolites. SZV 1287, 3-(4,5-diphenyl-1,3-oxazol-2-yl)propanal oxime; oxaprozin, 3-(4,5-diphenyloxazol-2-yl)propanoic acid; L 2799, 3-(4-(4-hydroxyphenyl)-5-phenyloxazol-2-yl)propanoic acid; L 2805, 3-(5-(4-hydroxyphenyl)-4-phenyloxazol-2-yl)propanoic acid; L 2811, 3-(4,5-bis(4-hydroxyphenyl)oxazol-2-yl)propanoic acid.

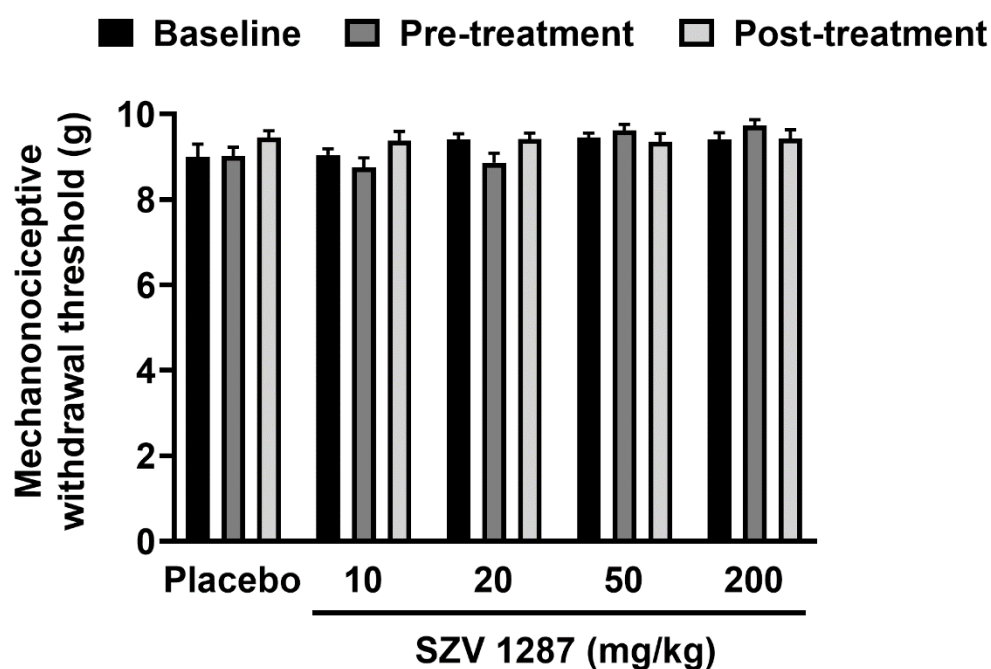

**Figure S4.** Mechanonociceptive withdrawal thresholds of the contralateral intact hind paws 2 h following single enterosolvent SZV 1287 capsule treatment (10, 20, 50 and 200 mg/kg) on 7th postoperative day. Data are shown as means  $\pm$  S.E.M. of  $n = 7$ –14 mice/group (repeated measures two-way ANOVA followed by Tukey's multiple comparison test).

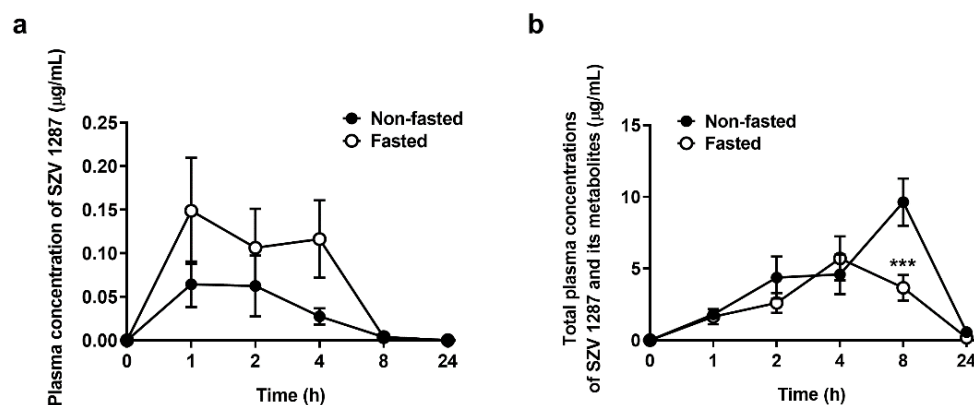

**Figure. S5.** Plasma concentrations-time curve of (a) SZV 1287, as well as (b) SZV 1287 and its main metabolites (oxaprozin, L 2799, L 2805, and L 2811) following enterosolvent capsule administration (20 mg/kg) in mice. Data are shown as means  $\pm$  S.E.M. of  $n = 7-8$  mice/time point, \*\*\*  $p < 0.001$  vs. non-fasted group; ordinary two-way ANOVA followed (fasting factor  $F = 4.78$ ,  $p = 0.0316$ ) by Sidak's multiple comparison test.

**Table Legends:****Table S1.** Plasma concentrations of SZV 1287 and its main metabolites (L 2811, L 2805, L 2799, and oxaprozin) following single enterosolvent capsule treatment (10 mg/kg) in mice.

| Animal Number | L 2811 (µg/mL) | L 2805 (µg/mL) | L 2799 (µg/mL) | Oxaprozin (µg/mL) | SZV 1287 (µg/mL) |
|---------------|----------------|----------------|----------------|-------------------|------------------|
| 1             | ND             | 0.73           | ND             | 1.56              | ND               |
| 2             | ND             | ND             | ND             | ND                | ND               |
| 3             | ND             | ND             | ND             | <0.5              | ND               |
| 4             | 1.20           | ND             | ND             | ND                | ND               |
| 5             | ND             | <0.5           | ND             | 1.21              | ND               |

Abbreviation: ND, not detected with HPLC-UV.

**Table S2.** Plasma concentrations of SZV 1287 and its main metabolites (L 2811, L 2805, L 2799, and oxaprozin) following single enterosolvent capsule treatment (20 mg/kg) in mice.

| Animal Number | L 2811 (µg/mL) | L 2805 (µg/mL) | L 2799 (µg/mL) | Oxaprozin (µg/mL) | SZV 1287 (µg/mL) |
|---------------|----------------|----------------|----------------|-------------------|------------------|
| 6             | ND             | ND             | ND             | 1.78              | ND               |
| 7             | 0.77           | ND             | ND             | 1.30              | ND               |
| 8             | ND             | 1.27           | 0.62           | 4.29              | ND               |
| 9             | ND             | 1.42           | 0.90           | 13.86             | ND               |
| 10            | ND             | ND             | ND             | 4.32              | ND               |
| 11            | ND             | 0.63           | ND             | 1.14              | ND               |
| 12            | ND             | 0.71           | ND             | 2.25              | ND               |
| 13            | ND             | 0.74           | ND             | 3.87              | ND               |
| 14            | 1.67           | ND             | ND             | ND                | ND               |

Abbreviation: ND, not detected with HPLC-UV.

**Table S3.** Plasma concentrations of SZV 1287 and its main metabolites (L 2811, L 2805, L 2799, and oxaprozin) following single enterosolvent capsule treatment (50 mg/kg) in mice.

| Animal Number | L 2811 (µg/mL) | L 2805 (µg/mL) | L 2799 (µg/mL) | Oxaprozin (µg/mL) | SZV 1287 (µg/mL) |
|---------------|----------------|----------------|----------------|-------------------|------------------|
| 15            | ND             | 0.59           | ND             | 1.95              | ND               |
| 16            | ND             | ND             | ND             | ND                | ND               |
| 17            | ND             | 1.44           | 0.73           | 10.40             | ND               |
| 18            | 0.83           | ND             | ND             | 1.30              | 0.34             |
| 19            | 0.70           | 2.14           | 1.00           | 9.03              | 0.56             |
| 20            | ND             | ND             | ND             | 1.43              | ND               |
| 21            | ND             | 0.72           | ND             | 5.48              | ND               |
| 22            | ND             | ND             | ND             | ND                | ND               |

Abbreviation: ND, not detected with HPLC-UV.

**Table S4.** Plasma concentrations of SZV 1287 and its main metabolites (L 2811, L 2805, L 2799, and oxaprozin) following single enterosolvent capsule treatment (200 mg/kg) in mice.

| Animal Number | L 2811 (µg/mL) | L 2805 (µg/mL) | L 2799 (µg/mL) | Oxaprozin (µg/mL) | SZV 1287 (µg/mL) |
|---------------|----------------|----------------|----------------|-------------------|------------------|
| 23            | ND             | <0.5           | <0.5           | 1.4               | <0.5             |
| 24            | ND             | 2.6            | 0.7            | 9.7               | <0.5             |
| 25            | ND             | 2.6            | 0.7            | 10.9              | <0.5             |
| 26            | ND             | 2.8            | 0.7            | 6.6               | <0.5             |
| 27            | ND             | 3.5            | 1.0            | 14.0              | 0.9              |
| 28            | ND             | 2.5            | 0.6            | 8.6               | <0.5             |
| 29            | 2.0            | 1.9            | 0.6            | 10.9              | 0.7              |

Abbreviation: ND, not detected with HPLC-UV.

**Table S5.** Concentrations of SZV 1287 and its main metabolites (L 2811, L 2805, L 2799, and oxaprozin) in the brain following single enterosolvent capsule treatment (10 mg/kg) in mice.

| Animal Number | L 2811 (µg/g) | L 2805 (µg/g) | L 2799 (µg/g) | Oxaprozin (µg/g) | SZV 1287 (µg/g) |
|---------------|---------------|---------------|---------------|------------------|-----------------|
| 1             | ND            | ND            | ND            | ND               | ND              |
| 2             | ND            | ND            | ND            | ND               | ND              |
| 3             | ND            | ND            | ND            | ND               | ND              |
| 4             | ND            | ND            | ND            | ND               | ND              |
| 5             | ND            | ND            | ND            | ND               | ND              |

Abbreviation: ND, not detected with HPLC-UV.

**Table S6.** Concentrations of SZV 1287 and its main metabolites (L 2811, L 2805, L 2799, and oxaprozin) in the brain following single enterosolvent capsule treatment (20 mg/kg) in mice.

| Animal Number | L 2811 (µg/g) | L 2805 (µg/g) | L 2799 (µg/g) | Oxaprozin (µg/g) | SZV 1287 (µg/g) |
|---------------|---------------|---------------|---------------|------------------|-----------------|
| 6             | <0.4          | ND            | ND            | ND               | <0.4            |
| 7             | ND            | ND            | ND            | ND               | ND              |
| 8             | <0.4          | ND            | ND            | <0.4             | <0.4            |
| 9             | <0.4          | ND            | ND            | <0.4             | 0.41            |
| 10            | <0.4          | ND            | ND            | <0.4             | ND              |
| 11            | ND            | ND            | ND            | ND               | 0.66            |
| 12            | ND            | ND            | ND            | ND               | <0.4            |
| 13            | ND            | ND            | ND            | ND               | ND              |
| 14            | ND            | ND            | ND            | ND               | ND              |

Abbreviation: ND, not detected with HPLC-UV.

**Table S7.** Concentrations of SZV 1287 and its main metabolites (L 2811, L 2805, L 2799, and oxaprozin) in the brain following single enterosolvent capsule treatment (50 mg/kg) in mice.

| Animal Number | L 2811 (µg/g) | L 2805 (µg/g) | L 2799 (µg/g) | Oxaprozin (µg/g) | SZV 1287 (µg/g) |
|---------------|---------------|---------------|---------------|------------------|-----------------|
| 15            | <0.4          | ND            | ND            | ND               | ND              |
| 16            | <0.4          | ND            | ND            | ND               | ND              |
| 17            | <0.4          | ND            | ND            | <0.4             | <0.4            |
| 18            | <0.4          | ND            | ND            | ND               | 0.94            |
| 19            | ND            | ND            | ND            | <0.4             | 1.16            |
| 20            | ND            | ND            | ND            | ND               | ND              |
| 21            | ND            | ND            | ND            | <0.4             | <0.4            |
| 22            | ND            | ND            | ND            | ND               | ND              |

Abbreviation: ND, not detected with HPLC-UV.

**Table S8.** Concentrations of SZV 1287 and its main metabolites (L 2811, L 2805, L 2799, and oxaprozin) in the brain following single enterosolvent capsule treatment (200 mg/kg) in mice.

| Animal Number | L 2811 (µg/g) | L 2805 (µg/g) | L 2799 (µg/g) | Oxaprozin (µg/g) | SZV 1287 (µg/g) |
|---------------|---------------|---------------|---------------|------------------|-----------------|
| 23            | ND            | ND            | ND            | ND               | ND              |
| 24            | ND            | ND            | ND            | ND               | 1.1             |
| 25            | ND            | ND            | ND            | <0.4             | 1.1             |
| 26            | ND            | ND            | ND            | <0.4             | 0.9             |
| 27            | ND            | ND            | ND            | 0.5              | 4.1             |
| 28            | ND            | ND            | ND            | <0.4             | 0.7             |
| 29            | ND            | ND            | ND            | 0.4              | 1.7             |

Abbreviation: ND, not detected with HPLC-UV.
